# Supplementary figures and images for: Dorsolateral septum GLP-1R neurons regulate feeding via lateral hypothalamic projections
Source: PubMed Central journal article supplement — Mol Metab. 2024 May 17;85:101960. doi: 10.1016/j.molmet.2024.101960 (PMC11153235; doi:10.1016/j.molmet.2024.101960), 2024-05-17

Global dLS<sup>GLP-1R</sup> neuronal activity manipulations

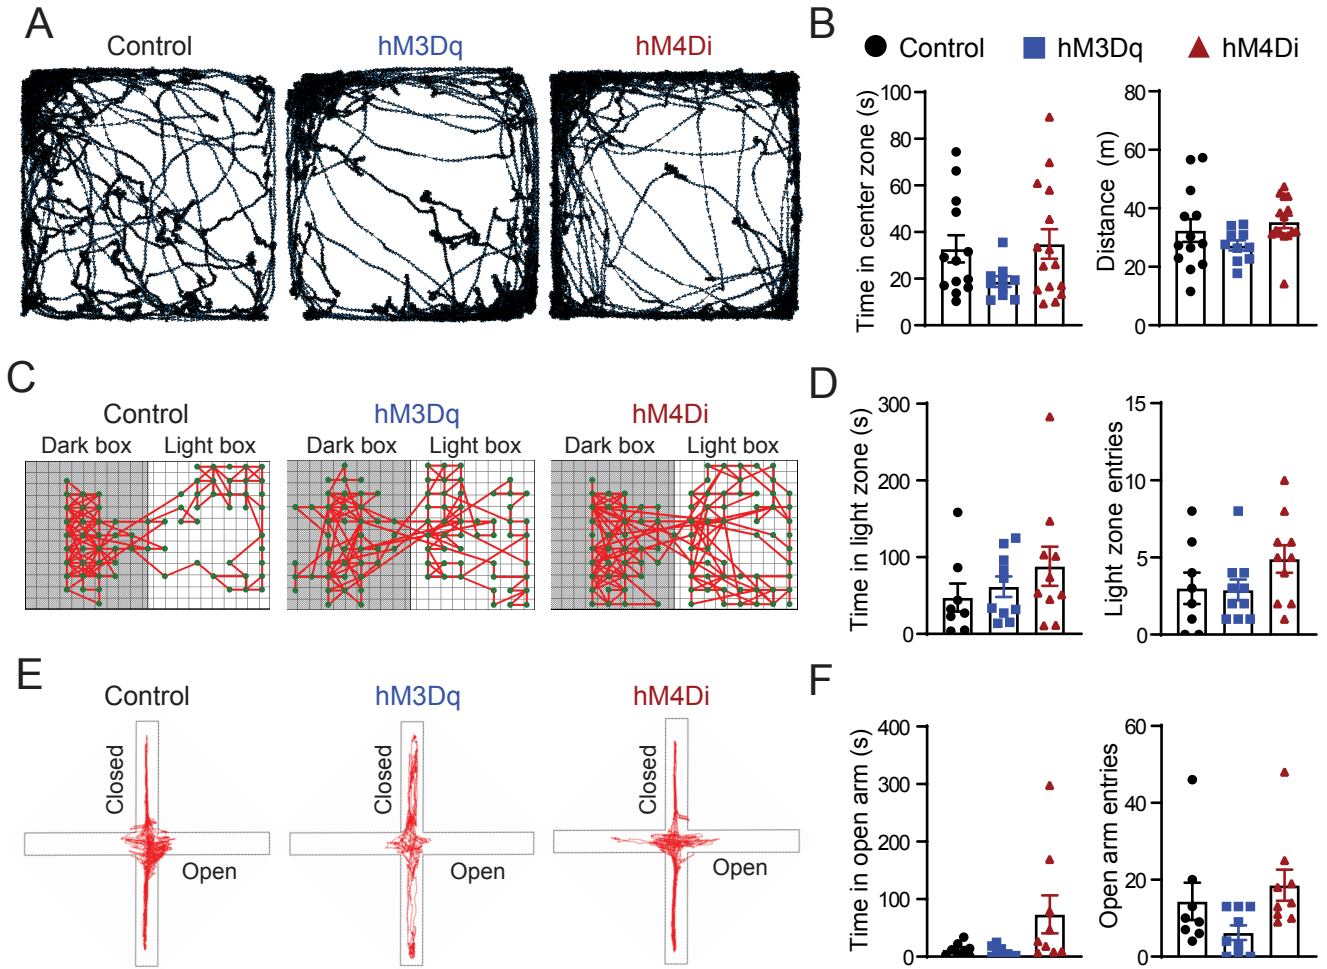

(Lu et al. Figure S1)

Supplement: mmc1.pdf [file mmc1.pdf]

Chemogenetic inhibition of  $dLS^{GLP-1R} \rightarrow$  LHA neurons

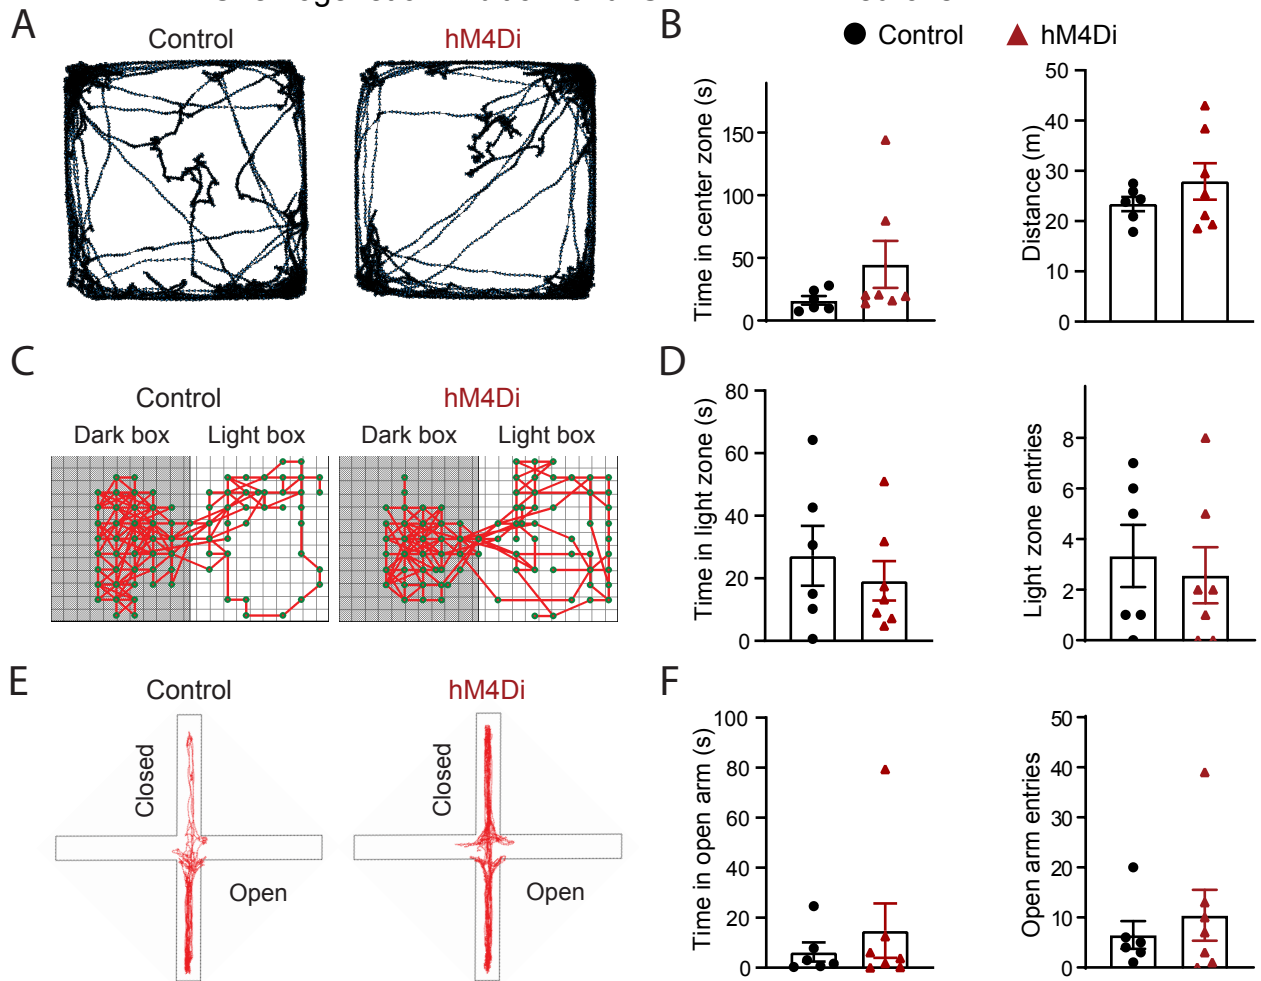

(Lu et al. Figure S2)

Supplement: mmc2.pdf [file mmc2.pdf]

Chemogenetic activation of dLS<sup>GLP-1R</sup> → LHA neurons

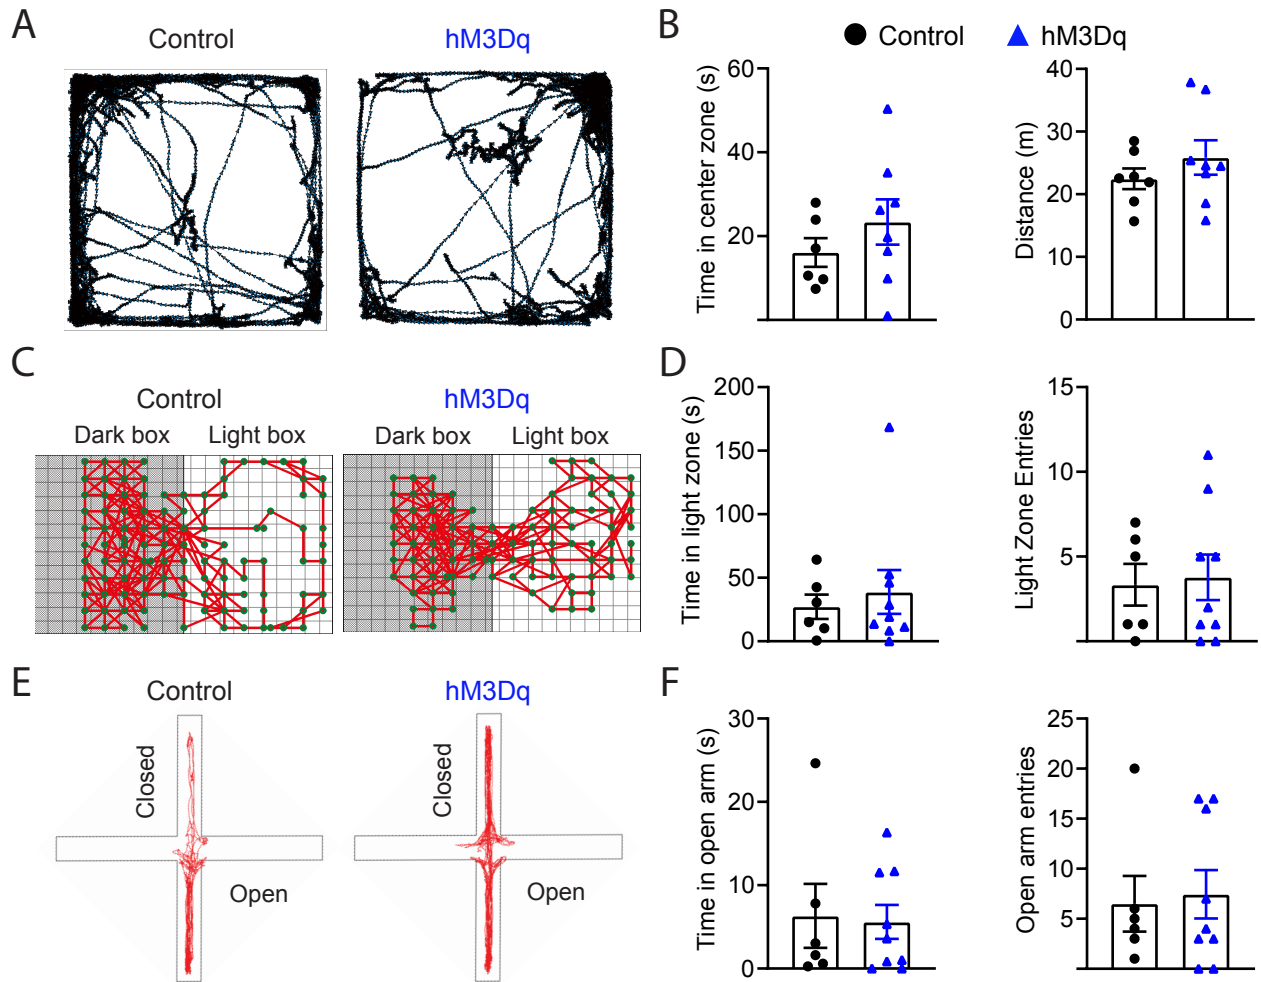

(Lu et al. Figure S3)

Supplement: mmc3.pdf [file mmc3.pdf]
